# Supplementary material
Source: publisher site journal article supplement (https://www.spandidos-publications.com/812/downloadSupplementary)

Figure S1. LncRNA and mRNA co-expression network. LncRNAs are represented by a red node and coding genes are represented by a blue node. Solid lines indicate positive correlation and dotted lines indicate negative correlation. LncRNA, long non-coding RNA.

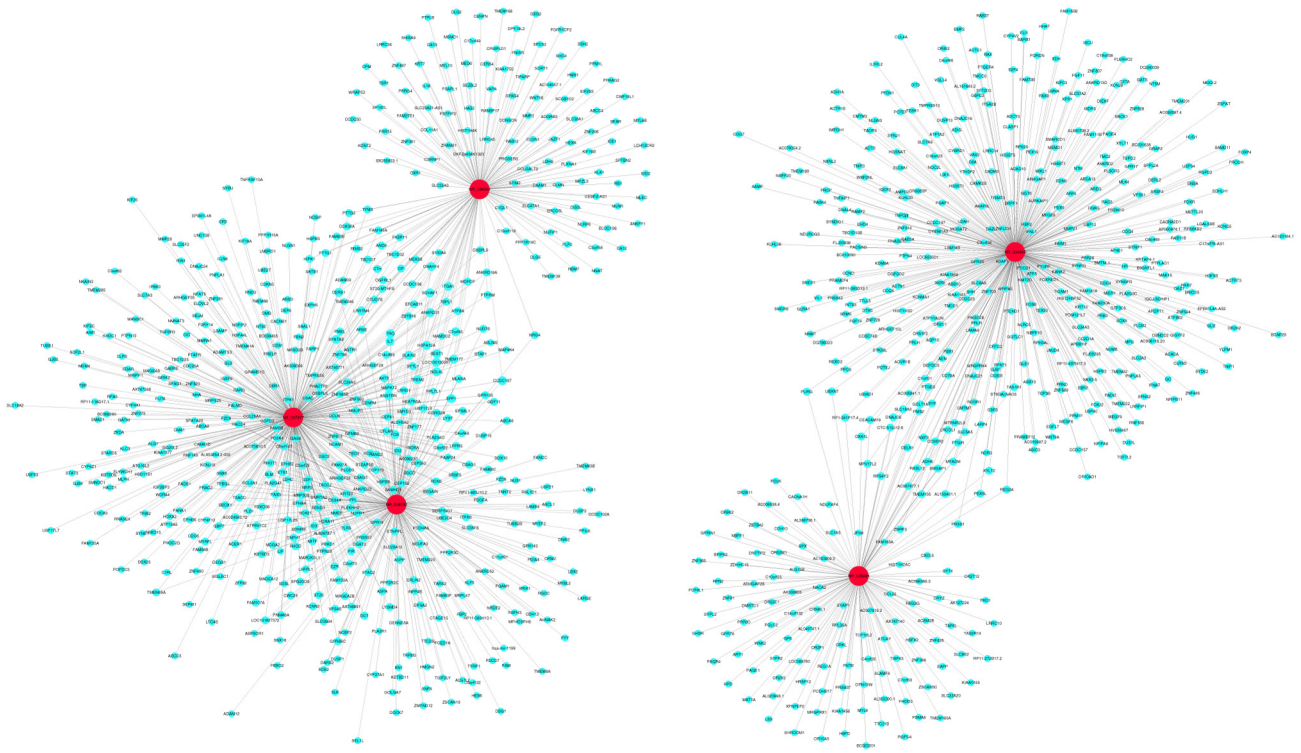

Supplement: Supplementary file 1 [file downloadSupplementary]
